# Supplementary material for: Deficiency of Gankyrin in the small intestine is associated with augmented colitis accompanied by altered bacterial composition of intestinal microbiota
Source: BMC Gastroenterol. 2020 Jan 15;20:12. doi: 10.1186/s12876-019-1156-0 (PMC6964040; doi:10.1186/s12876-019-1156-0)
Supplement: Supplementary file 10 — Additional file 10: Table S2. Number of sequence reads analyzed during the 16S rRNA amplicon analysis conducted to understand the intestinal microbiota in the co-housed mice groups [file 12876_2019_1156_MOESM10_ESM.xlsx]

## Sheet: Sheet1
Table S2. Number of sequence reads analyzed during the 16S rRNA amplicon analysis conducted to understand the intestinal microbiota in the co-housed mice groups
Cohousing	Treatment	Body part	Mice	Pairs of raw reads	Merged reads	Reads in OTUs
Cohoused	DSS-treated	Rectum	GKf/f	162116	156365	115181
				91296	87777	59249
				157840	152540	103768
			Villin-Cre;GKf/f	125961	121134	72483
				80376	77149	43439
				125406	120750	61971
Non-cohoused	Untreated	Cecum	GKf/f	45733	37945	19870
				153593	134494	69323
				146664	127381	67498
			Villin-Cre;GKf/f	138984	116816	52771
				205983	173395	81191
				174592	151042	77886
		Rectum	GKf/f	108219	93088	57425
				119144	104912	64334
				132543	116104	56303
			Villin-Cre;GKf/f	166120	141459	71422
				177145	150617	88621
				153489	130854	65534
	DSS-treated	Cecum	GKf/f	111473	89718	67104
				82429	62535	47132
				86110	82334	47627
				322471	309961	165085
				256380	245169	142526
			Villin-Cre;GKf/f	170690	147242	85468
				109655	96143	59220
				118801	104575	48300
				215726	185793	101760
				94345	90886	54670
				424553	403679	265871
		Rectum	GKf/f	158088	140514	82904
				162429	146540	85878
				146585	129640	72547
				96962	91832	66376
				82258	76967	51828
				67262	64477	47746
			Villin-Cre;GKf/f	146398	129707	76942
				149141	133210	70455
				129604	117091	60072
				64784	61357	40852
				58762	55256	41126
				69251	64639	40498
Total				5789361	5223087	3050256
